# Supplementary material
Source: Springer Nature journal article supplement (https://www.springermedizin.de/resource/supplementary/12885_2012_3527_MOESM7_ESM.pdf/9463898)
Supplement: MOESM7 [file 9463898]

**A**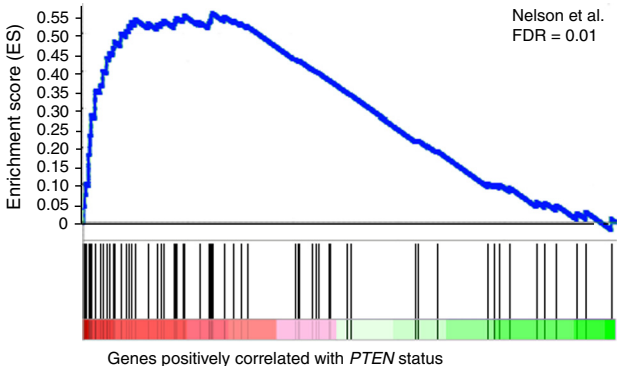**B**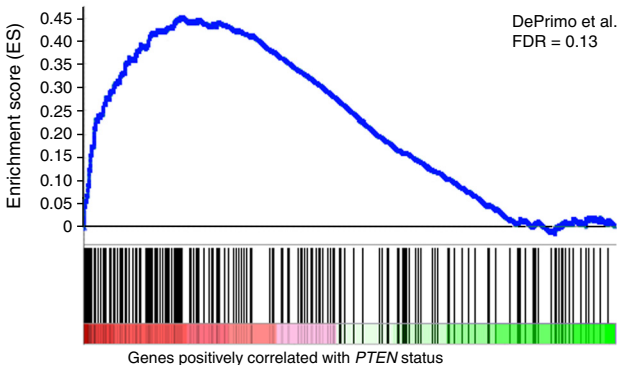**C**

*HPDG*  
*KLF4*  
*AZGP1*  
*AKAP12*  
*ABCC4*  
*DNAJB9*  
*ORM2*  
*CDC14B*  
*ABHD2*  
*KLK4*  
*CPD*  
*INPP4B*  
*TMPRSS2*  
*ELL2*  
*ADAMTS1*  
*LIFR*  
*UNC13B*  
*VAPA*  
*KLK2*  
*TNFAIP8*  
*DBI*  
*IQGAP2*  
*ACTN1*  
*SEPP1*  
*SEC24D*  
*DCTN3*  
*LMAN1*  
*KRT8*  
*UAP1*  
*NKX3-1*  
*PIAS1*  
*HOMER2*  
*KLK3*  
*KRT19*  
*DHCR24*  
*SLC38A2*  
*GSR*  
*PTPN21*  
*APPBP2*  
*SLC26A2*  
*HERC3*  
*ITGAV*  
*SMS*
